# Supplementary material
Source: ML conference proceedings conference paper supplement (https://proceedings.mlr.press/v80/han18b.html)
Supplement: Supplementary file [file han18b-supp.pdf]

## Appendix A: Proof of Theorem 1

**Proof:** By definition,  $w(\mathbf{x}) = \rho(\mathbf{x})/p(\mathbf{x})$ ,  $\nabla_{\mathbf{x}}w(\mathbf{x}) = w(\mathbf{x})\mathbf{s}_\rho(\mathbf{x}) - w(\mathbf{x})\mathbf{s}_p(\mathbf{x})$ ,

$$\begin{aligned}\mathcal{A}_p^\top(w(\mathbf{x})\phi(\mathbf{x})) &= w(\mathbf{x})\mathbf{s}_p(\mathbf{x})^\top\phi(\mathbf{x}) + \nabla_{\mathbf{x}}^\top(w(\mathbf{x})\phi(\mathbf{x})) \\ &= w(\mathbf{x})\mathbf{s}_p(\mathbf{x})^\top\phi(\mathbf{x}) + \nabla_{\mathbf{x}}w(\mathbf{x})^\top\phi(\mathbf{x}) + w(\mathbf{x})\nabla_{\mathbf{x}}^\top\phi(\mathbf{x}) \\ &= w(\mathbf{x})\mathbf{s}_\rho(\mathbf{x})^\top\phi(\mathbf{x}) + w(\mathbf{x})\nabla_{\mathbf{x}}^\top\phi(\mathbf{x}) = w(\mathbf{x})\mathcal{A}_\rho^\top\phi(\mathbf{x}).\end{aligned}$$

Therefore, we have

$$\mathbb{D}_{\mathcal{F},\rho}(q \parallel p) = \max_{\phi \in \mathcal{F}} \{\mathbb{E}_{\mathbf{x} \sim q}[\mathcal{A}_p^\top(w(\mathbf{x})\phi(\mathbf{x}))]\} \quad (27)$$

$$= \max_{\phi \in w\mathcal{F}} \{\mathbb{E}_{\mathbf{x} \sim q}[\mathcal{A}_p^\top\phi(\mathbf{x})]\} \quad (28)$$

$$= \mathbb{D}_{w\mathcal{F}}(q \parallel p).$$

## Appendix B: Proof of Theorem 2

**Proof:** When  $\mathcal{H}$  is an RKHS with kernel  $k(\mathbf{x}, \mathbf{x}')$ , then  $w\mathcal{H}$  is also an RKHS, with an ‘‘importance weighted kernel’’

$$\tilde{k}(\mathbf{x}, \mathbf{x}') = w(\mathbf{x})w(\mathbf{x}')k(\mathbf{x}, \mathbf{x}'). \quad (29)$$

Following Lemma 3.2 in Liu & Wang (2016), the optimal solution of the optimization problem (28) is,

$$\begin{aligned}w(\cdot)\phi^*(\cdot) &= \mathbb{E}_{\mathbf{x} \sim q}[\mathbf{s}_p(\mathbf{x})w(\mathbf{x})k(\mathbf{x}, \cdot)w(\cdot) + \nabla_{\mathbf{x}}(w(\mathbf{x})k(\mathbf{x}, \cdot)w(\cdot))] \\ &= w(\cdot)\mathbb{E}_{\mathbf{x} \sim q}[w(\mathbf{x})\mathcal{A}_\rho k(\mathbf{x}, \cdot)].\end{aligned}$$

This gives

$$\phi^*(\cdot) = \mathbb{E}_{\mathbf{x} \sim q}[w(\mathbf{x})\mathcal{A}_\rho k(\mathbf{x}, \cdot)].$$

Following Theorem 3.6 (Liu et al., 2016), we can show that

$$\mathbb{D}_{\mathcal{F},\rho}(q \parallel p) = (\mathbb{E}_{\mathbf{x}, \mathbf{x}' \sim q}[\tilde{\kappa}_p(\mathbf{x}, \mathbf{x}')])^{\frac{1}{2}}, \quad (30)$$

where

$$\tilde{\kappa}_p(\mathbf{x}, \mathbf{x}') = (\mathcal{A}'_p)^\top(\mathcal{A}_p \tilde{k}(\mathbf{x}, \mathbf{x}')).$$

and  $\mathcal{A}_p$  and  $\mathcal{A}'_p$  denote the Stein operator applied on variable  $\mathbf{x}$  and  $\mathbf{x}'$ , respectively. Applying Theorem 1, we have

$$\begin{aligned}\tilde{\kappa}_p(\mathbf{x}, \mathbf{x}') &= (\mathcal{A}'_p)^\top(\mathcal{A}_p(w(\mathbf{x})w(\mathbf{x}')k(\mathbf{x}, \mathbf{x}'))) \\ &= (\mathcal{A}'_p)^\top(w(\mathbf{x})\mathcal{A}_\rho(w(\mathbf{x}')k(\mathbf{x}, \mathbf{x}'))) \\ &= (\mathcal{A}'_p)^\top(w(\mathbf{x}')w(\mathbf{x})\mathcal{A}_\rho(k(\mathbf{x}, \mathbf{x}'))) \\ &= w(\mathbf{x}')w(\mathbf{x})(\mathcal{A}'_\rho)^\top(\mathcal{A}_\rho(k(\mathbf{x}, \mathbf{x}'))) \\ &= w(\mathbf{x}')w(\mathbf{x})\kappa_\rho(\mathbf{x}, \mathbf{x}'),\end{aligned}$$

where we recall that  $\kappa_\rho(\mathbf{x}, \mathbf{x}') = (\mathcal{A}'_\rho)^\top(\mathcal{A}_\rho k(\mathbf{x}, \mathbf{x}'))$ . Therefore,  $\mathbb{D}_{\mathcal{F},\rho}(q, p)$  in (30) equals

$$\mathbb{D}_{\mathcal{F},\rho}(q, p) = (\mathbb{E}_{\mathbf{x}, \mathbf{x}' \sim q}[w(\mathbf{x})\kappa_\rho(\mathbf{x}, \mathbf{x}')w(\mathbf{x}')])^{\frac{1}{2}}.$$

This completes the proof. □
